# Supplementary material
Source: MDPI journal article supplement (https://www.mdpi.com/2073-4344/10/7/753)
Supplement: s1 [file s1]

## **Supplementary Information**

### **High Degradation of Trichloroethylene in Water by Nanostructured MeNPs@CALB Biohybrid Catalysts**

**Noelia Losada-Garcia <sup>1</sup>, Alba Rodriguez-Otero <sup>1</sup> and Jose M. Palomo <sup>1,\*</sup>**

<sup>1</sup> Department of Biocatalysis. Institute of Catalysis (CSIC). Marie Curie 2.

Cantoblanco. Campus UAM, 28049 Madrid, Spain;

\* Correspondence: josempalomo@icp.csic.es; Tel.: +34-9158-5476-8

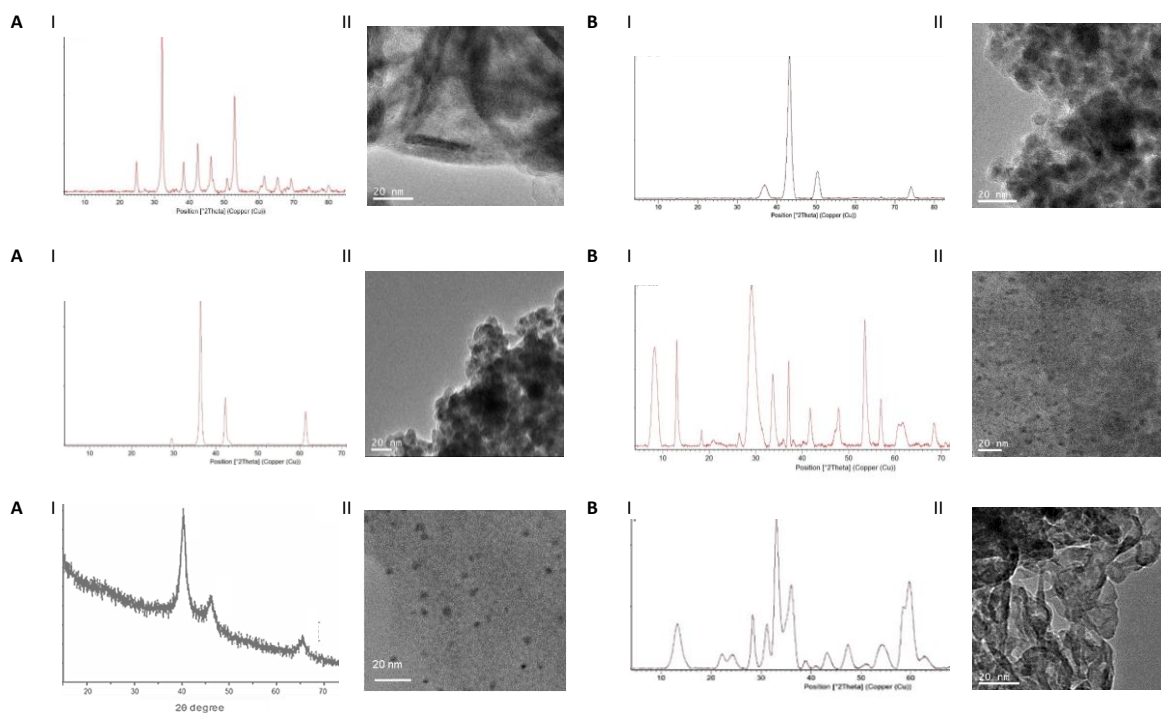

**Figure S1.** Characterization of the different heterogeneous metal bionanohybrids synthesized. A)  $\text{FeCO}_3@CALB$ . B)  $\text{Cu}(0)@CALB$ . C)  $\text{Cu}_2\text{O}@CALB$ . D)  $\text{Cu}_3(\text{PO}_4)_2@CALB$ . E)  $\text{Pd}(0)@CALB$ , F)  $\text{ZnO}@CALB$ ; (I) XRD pattern; (II) TEM image.

**Table S1.** Content of metal (Me) in the different bionanohybrid determined by ICP-OES.

| <i>Bionanohybrid</i>                                    | <i>Amount of Me by ICP-OES (%)<sup>a</sup></i> |
|---------------------------------------------------------|------------------------------------------------|
| <b>FeCO<sub>3</sub>@CALB</b>                            | 47                                             |
| <b>Pd(0)@CALB</b>                                       | 23                                             |
| <b>Cu(0)@CALB</b>                                       | 84                                             |
| <b>Cu<sub>2</sub>O@CALB</b>                             | 60                                             |
| <b>Cu<sub>3</sub>(PO<sub>4</sub>)<sub>2</sub>@CALB</b>  | 32                                             |
| <b>Cu<sub>3</sub>(PO<sub>4</sub>)<sub>2</sub>@CALB1</b> | 35                                             |
| <b>Cu<sub>3</sub>(PO<sub>4</sub>)<sub>2</sub>@CALB2</b> | 22                                             |
| <b>Cu<sub>3</sub>(PO<sub>4</sub>)<sub>2</sub>@CALB3</b> | 48                                             |
| <b>ZnO@CALB</b>                                         | 36                                             |

<sup>a</sup>The measurement was performed of the solid material. 10 mg of the solid powder was treated with 5 mL of HCl (37% v/v) for digestion. Then, it was added with 5 mL of water, centrifuged and the clear solution analyzed by metal content.
